# Supplementary material for: Clinical Validation of Liquid Biopsy for Faster Molecular Diagnosis of EBV-Positive Burkitt Lymphoma
Source: Research Square preprint supplement (doi:10.21203/rs.3.rs-6820773/v1), 2025-07-14
Supplement: Supplementary file 1 [file 3e8ab50cb9b2f9f90a0506c6.docx]

**Sample Collection and Processing**

Approximately 8mls of whole blood was collected in Roche ccfDNA tubes or PAXgene blood ccfDNA tubes. Plasma was separated by centrifugation at 1600g for a duration of 15 minutes continuously, followed by a second centrifugation of the separated plasma at 4500g for 15 minutes. Separated plasma was stored in 1.5ml Eppendorf tubes at –80°C.

**Extraction and Quantification of cfDNA**

cfDNA was extracted from plasma using the QIAamp Circulating Nucleic Acid Kit (Qiagen, Cat no – 51304, 51306) according to the manufacturers instruction. Briefly, it involved four main steps; first, samples are lysed to inactivate DNases and RNases and allow complete release of nucleic acids from bound proteins, lipids and vesicles. Second, the lysates are transferred onto a QIAamp Mini column, and circulating nucleic acids are adsorbed from a large volume onto the small silica membrane as the lysate is drawn through by vacuum pressure. Third, while the nucleic acids remain bound to the membrane, contaminants are washed away in a 3 step wash process. The final step involves elution of highly purified nucleic acid. The quantification of cfDNA was done by Qubit fluorimeter 3.0 using the qubit high-sensitivity assay (Thermo Fisher Scientific, Walthan, MA, USA)

**Library Preparation and targeted sequencing**

Libraries were constructed using 50ng (in 30ul) of extracted cfDNA using the ThruPLEX Tag-Seq HV kit according to the manufacturer’s protocol. The process involved addition of unique ThruPLEX HV Unique Dual indexed (UDI) PCR primers to aid with sample tracking. Seven cycles were performed to ensure a yield of >500ng depending on the concentration of the input DNA. This was followed by a purification step through magnetic separation using AMPure XP beads (Beckman coulter, CA USA). The final library was quantified and validated using the Qubit HS kit and the Bio-analyser High Sensitivity DNA kit, according to manufacturer’s instructions. Library hybridization and capture was done using the xGen hybridization capture kit according to the manufacturer’s instruction.

**Panel Design and Verification**

The procedure used a custom-made NGS panel targeting mutational hotspots in 17 EBL and HL-related genes (*MYC, IGH, IGK, IGL, ID3, TP53, TNFAIP3, NFKBIE*, *SOCS1, EP300, BTK, STAT6, CSF2RB, ITPBK, XPO1, B2M*) selected based on results from previous studies, and EBV genes expressed in latently infected cells; *EBER1, EBER2* and *EBNA2.* The final panel manufactured by Integrated DNA Technologies (IDT) consisted of 731 probes at a size of 148 kilo-bases to permit for compatibility with either the iSeq100 or MiSeq sequencing platforms. The final panel design with the genomic coordinates of our genes of interest is listed in Table I. Sequencing was conducted on the MiSeq platform using the MiSeq reagent kit v2 (300 cycles) at a loading concentration of 10 pM, with 6 samples per run.

**Table 1: Genomic Targets for EBVL Next Generation Sequencing Panel**

| **Genome** | ***Reference*** | ***Ref.*** | ***Transcript*** | ***Target (exons)*** | ***Chr*** | ***Start*** | ***Stop*** | ***Comments*** |
| --- | --- | --- | --- | --- | --- | --- | --- | --- |
| EBV | EBV-WT | EBER1 | NC_007605.1 |  |  | 6,629 | 6,795 | 100% identical to EBV type 2 EBER1, for EBV detection |
| EBV | EBV-WT | EBER2 | NC_007605.1 |  |  | 6,956 | 7,128 | 100% identical to EBV type 2 EBER2, for EBV detection |
| EBV | EBV-WT | EBNA2 | YP_401644.1_10 |  |  | 659 | 790 | Specific to EBV Type 1. For EBV strain identification |
| Human | hg19 | 5' MYC |  |  | 8 | 128,746,246 | 128,747,679 | Class 2 breakpoints, covers 20 breakpoints from study referenced |
| Human | hg19 | MYC | NM_002467.5 | 1 | 8 | 128,747,680 | 128,748,869 | Class 1/2 breakpoints, typically seen in eBL |
| Human | hg19 | MYC | NM_002467.5 |  | 8 | 128,748,870 | 128,750,493 | Class 1 breakpoints |
| Human | hg19 | MYC | NM_002467.5 | 2 | 8 | 128,750,494 | 128,751,265 | Commonly mutated in BL. Included as 'safety net' encase translocations aren't captured |
| Human | hg19 | ITPKB | NM_002221.3 | 2 | 1 | 226,923,228 | 226,925,159 |  |
| Human | hg19 | XPO1 | NM_003400 | 1-15 | 2 | 61,719,470 | 61,719,471 | c.1711-12 (p.E517) cHL hotspot, but also PMBL (1711) & CLL (1712) |
| Human | hg19 | TNFAIP3 | NM_001270508.1 | 1-9 | 6 | 138,188,581 | 138,204,449 |  |
| Human | hg19 | NFKBIE | NM_004556.2 | 1-6 | 6 | 44,226,953 | 44,233,502 |  |
| Human | hg19 | STAT6 | NM_001178078 | 11-18 | 12 | 57,492,575 | 57,498,369 | c.1249A>T and c.1255G>A hotspots, but common in PMBL |
| Human | hg19 | EP300 | NM_001429.3 | 24-29 | 22 | 41,564,453 | 41,569,788 |  |
| Human | hg19 | BTK | NM_001287344 | 1-19 | X | 100,604,438 | 100,641,183 |  |
| Human | hg19 | B2M | NM_004048.2 | 1-2 | 15 | 45,003,675 | 45,007,899 | Mutations frequent in splice donor/acceptor region of intron 1 |
| Human | hg19 | SOCS1 | NM_003745 | 1-2 | 16 | 11,348,262 | 11,350,036 |  |
| Human | hg19 | CSF2RB | NM_00395.3 | 6, 14 | 22 | 37,325,681 | 37,335,000 |  |
| Human | hg19 | TP53 | NM_000546.5 | 4-8 | 17 | 7,577,019 | 7,579,590 | BL and HL |
| Human | hg19 | ID3 | NM_002167.4 | 1-3 | 1 | 23,884,409 | 23,886,285 |  |
| Human | hg19 | IGHA2 | ENST00000390539.2 | 1-3 | 14 | 106,053,226 | 106,054,732 | IG C gene |
| Human | hg19 | IGHA2 |  |  | 14 | 106,056,222 | 106,056,838 | S*α* region |
| Human | hg19 | IGHA2 |  |  | 14 | 106,057,056 | 106,057,601 | S*α* region |
| Human | hg19 | IGHA1 | ENST00000390547.2 | 1-3 | 14 | 106,173,457 | 106,175,002 | IG C gene |
| Human | hg19 | IGHA1 |  |  | 14 | 106,177,009 | 106,177,963 | S*α* region |
| Human | hg19 | IGHG1 | ENST00000390548.2 | 1-6 | 14 | 106,202,680 | 106,209,408 | IG C gene |
| Human | hg19 | IGHG1 |  |  | 14 | 106,210,947 | 106,211,836 | S*γ* region. Contains 7 breakpoints from 2 publications |
| Human | hg19 | IGHG1 |  |  | 14 | 106,212,432 | 106,212,705 | S*γ* region. Contains 4 breakpoints from 2 publications |
| Human | hg19 | IGHG3 |  |  | 14 | 106,213,054 | 106,213,828 | nc region. Contains 3 breakpoints from 2 publications |
| Human | hg19 | IGHG3 | ENST00000390551.2 | 1-7 | 14 | 106,235,439 | 106,237,742 | IG C gene |
| Human | hg19 | IGHG3 |  |  | 14 | 106,239,969 | 106,240,335 | S*γ* region. Contains 6 breakpoints from 2 publications |
| Human | hg19 | IGHM | ENST00000390559.2 | 1-4 | 14 | 106,320,349 | 106,322,323 | IG C gene |
| Human | hg19 | IGHM |  |  | 14 | 106,324,109 | 106,324,904 | S*μ* region. Contains 7 breakpoints from 2 publications |
| Human | hg19 | IGHM |  |  | 14 | 106,325,023 | 106,325,998 | S*μ* region. Contains 12 breakpoints from 2 publications |
| Human | hg19 | IGHM |  |  | 14 | 106,326,019 | 106,326,648 | S*μ* region. Contains 18 breakpoints from 2 publications |
| Human | hg19 | IGHM |  |  | 14 | 106,326,933 | 106,327,173 | S*μ* region. Contains 3 breakpoints from 2 publications |
| Human | hg19 | IGJ |  |  | 14 | 106,328,547 | 106,329,405 | nc region. Contains 8 breakpoints from 2 publications |
| Human | hg19 | IGHJ6 | ENST00000390560.2 | 1 | 14 | 106,329,406 | 106,329,470 | IG J gene |
| Human | hg19 | IGHJ6-J5 |  |  | 14 | 106,329,469 | 106,330,023 | nc region. 11 breakpoints from 1 publication |
| Human | hg19 | IGHJ5 | ENST00000488476 | 1 | 14 | 106,330,024 | 106,330,072 | IG J gene |
| Human | hg19 | IGHJ5-J4 |  |  | 14 | 106,330,073 | 106,330,423 | nc region |
| Human | hg19 | IGHJ4 | ENST00000461719 | 1 | 14 | 106,330,424 | 106,330,470 | IG J gene |
| Human | hg19 | IGHJ3 | ENST00000463911 | 1 | 14 | 106,330,797 | 106,330,845 | IG J gene |
| Human | hg19 | IGHJ2 | ENST00000390564.2 | 1 | 14 | 106,331,409 | 106,331,460 | IG J gene |
| Human | hg19 | IGHJ1 | ENST00000390565.1 | 1 | 14 | 106,331,617 | 106,331,668 | IG J gene |
| Human | hg19 | IGHV1-2 | ENST00000390594.2 | 1-2 | 14 | 106,452,671 | 106,453,170 | IG V gene. Contains 3 breakpoints from 2 publications |
| Human | hg19 | IGHV1-3 | ENST00000390595.2 | 1-2 | 14 | 106,471,246 | 106,471,723 |  |
| Human | hg19 | IGHV2-5 | ENST00000390597 | 1-2 | 14 | 106,494,135 | 106,494,597 |  |
| Human | hg19 | IGHV3-7 | ENST00000390598 | 1-2 | 14 | 106,518,400 | 106,518,932 |  |
| Human | hg19 | IGHV1-8 | ENST00000390599.2 | 1-2 | 14 | 106,539,079 | 106,539,577 | Associated predominantly with EBV-negative e/sBL |
| Human | hg19 | IGHV1-18 | ENST00000390605.2 | 1-2 | 14 | 106,641,563 | 106,642,056 | 3 breakpoint positions from 2 publications |
| Human | hg19 | IGHV3-21 | ENST00000390607.2 | 1-2 | 14 | 106,691,673 | 106,692,203 | Associated with EBV-positive e/sBL |
| Human | hg19 | IGHV3-23 | ENST00000390609 | 1-2 | 14 | 106,725,198 | 106,725,733 | 2 breakpoint positions from 2 publications, more prevalent in DLBCL than s/eBL |
| Human | hg19 | IGHV3-30 | ENST00000390613.2 | 1-2 | 14 | 106,791,005 | 106,791,536 | 1 breakpoint position from 2 publications |
| Human | hg19 | IGHV4-31 | ENST00000438142.2 | 1-2 | 14 | 106,805,209 | 106,805,716 |  |
| Human | hg19 | IGHV3-33 | ENST00000390615.2 | 1-2 | 14 | 106,815,722 | 106,816,253 |  |
| Human | hg19 | IGHV4-34 | ENST00000390616.2 | 1-2 | 14 | 106,829,594 | 106,830,076 | Equally prevalent in DLBCL |
| Human | hg19 | IGHV4-39 | ENST00000390619.2 | 1-2 | 14 | 106,877,619 | 106,878,126 |  |
| Human | hg19 | IGHV1-46 | ENST00000390622.2 | 1-2 | 14 | 106,967,049 | 106,967,788 | 2 breakpoints from 2 publications |
| Human | hg19 | IGHV5-51 | ENST00000390626.2 | 1-2 | 14 | 107,034,729 | 107,035,221 |  |
| Human | hg19 | IGHV4-59 | ENST00000455737.1 | 1-3 | 14 | 107,081,806 | 107,083,830 |  |
| Human | hg19 | IGHV1-69 | ENST00000390633.2 | 1-2 | 14 | 107,169,931 | 107,170,428 |  |
| Human | hg19 | IGHV2-70 | ENST00000390634.2 | 1-2 | 14 | 107,178,820 | 107,179,338 |  |
| Human | hg19 | IGLJ1 | ENST00000390320 | 1 | 22 | 23,235,872 | 23,235,998 |  |
| Human | hg19 | IGLJ2 | ENST00000390322.2 | 1 | 22 | 23,241,661 | 23,241,835 |  |
| Human | hg19 | IGLJ3 | ENST00000390324.2 | 1 | 22 | 23,247,030 | 23,247,205 |  |
| Human | hg19 | IGLJ4 | ENST00000390326.2 | 1 | 22 | 23,252,744 | 23,252,776 |  |
| Human | hg19 | IGLJ5 | ENST00000390327.2 | 1 | 22 | 23,256,408 | 23,256,479 |  |
| Human | hg19 | IGLJ6 | ENST00000390328 | 1 | 22 | 23,260,304 | 23,260,373 |  |
| Human | hg19 | IGLV6-57 | ENST00000390285.3 | 1-2 | 22 | 22,550,113 | 22,550,860 |  |
| Human | hg19 | IGLV1-51 | ENST00000390290.2 | 1-2 | 22 | 22,676,828 | 22,677,336 |  |
| Human | hg19 | IGLV1-44 | ENST00000390297.2 | 1-2 | 22 | 22,735,135 | 22,735,715 | More frequent than that observed in DLBCL |
| Human | hg19 | IGLV1-40 | ENST00000390299.2 | 1-2 | 22 | 22,764,098 | 22,764,614 |  |
| Human | hg19 | IGLV3-25 | ENST00000390305.2 | 1-2 | 22 | 23,029,190 | 23,029,735 |  |
| Human | hg19 | IGLV2-14 | ENST00000390312.2 | 1-2 | 22 | 23,101,189 | 23,101,707 |  |
| Human | hg19 | IGKJ1 | ENST00000390242 | 1 | 2 | 89,161,398 | 89,161,435 |  |
| Human | hg19 | IGKJ2 | ENST00000390241.2 | 1 | 2 | 89,161,037 | 89,161,074 |  |
| Human | hg19 | IGKJ3 | ENST00000390240 | 1 | 2 | 89,160,733 | 89,160,770 |  |
| Human | hg19 | IGKJ4 | ENST00000390239.2 | 1 | 2 | 89,160,398 | 89,160,434 |  |
| Human | hg19 | IGKJ5 | ENST00000390238 | 1 | 2 | 89,160,080 | 89,160,117 |  |
| Human | hg19 | IGKC | ENST00000390237.2 | 1 | 2 | 89,156,674 | 89,157,196 |  |
| Human | hg19 | IGKV4-1 | ENST00000390243.2 | 1-2 | 2 | 89,184,913 | 89,185,669 |  |
| Human | hg19 | IGKV1-5 | ENST00000496168.1 | 1-2 | 2 | 89,246,819 | 89,247,475 |  |
| Human | hg19 | IGKV3-20 | ENST00000492167.1 | 1-2 | 2 | 89,442,057 | 89,442,643 |  |
| Human | hg19 | IGKV1-33 | ENST00000473726.1 | 1-2 | 2 | 89,567,758 | 89,568,263 |  |
| Human | hg19 | IGKV1-37 | ENST00000465170.1 | 1-2 | 2 | 89,597,021 | 89,597,542 |  |
| Human | hg19 | IGKV1-39 | ENST00000498574.1 | 1-2 | 2 | 89,619,383 | 89,619,904 |  |
| Human | hg19 | IGKV1-27 | ENST00000498435 | 1-2 | 2 | 89,512,908 | 89,513,413 |  |
| Human | hg19 | rs28372410 |  |  | 1 | 248,512,064 | 248,512,064 | unique human snps |
| Human | hg19 | rs4542826 |  |  | 2 | 33,413,949 | 33,413,949 | unique human snps |
| Human | hg19 | rs2717225 |  |  | 3 | 122,873,923 | 122,873,923 | unique human snps |
| Human | hg19 | rs2303808 |  |  | 5 | 39,074,296 | 39,074,296 | unique human snps |
| Human | hg19 | rs2286213 |  |  | 7 | 18,914,251 | 18,914,251 | unique human snps |
| Human | hg19 | rs7039358 |  |  | 9 | 90,401,638 | 90,401,638 | unique human snps |
| Human | hg19 | rs34084011 |  |  | 10 | 28,233,933 | 28,233,933 | unique human snps |
| Human | hg19 | rs7497712 |  |  | 15 | 100,821,647 | 100,821,647 | unique human snps |
| Human | hg19 | rs3816550 |  |  | 19 | 17,173,487 | 17,173,487 | unique human snps |
| Human | hg19 | rs723469 |  |  | 21 | 32,525,345 | 32,525,345 | unique human snps |

**Bio-informatics Analysis**

The sequence data was analyzed and stored by a bespoke pipeline (courtesy of the Oxford Molecular Diagnostic Centre) in a HIPAA (Health Insurance Portability and Accountability Act of 1996) compliant, AWS (Amazon Web Services) cloud. Paired reads were combined and statistics generated on the total number of reads and invalid reads, using a custom tool (*udini*). The raw sequence data in FASTQ format was aligned to GRCh37 (hs37d5) with BWA-MEM2. Sorting was done using *samtools*. De-duplication of reads and generation of error rates and family sizes was done by a custom-made tool (*elduderino*). The de-duplicated FASQ was re-aligned to GRCh37 with BWA-MEM2 and fragment sizes calculated using read pairs by a custom script (available on request). Another custom script (available on request) was used to map the reads onto the genomic regions (targeted genes) of interest and calculate copies per cell for the EBV genes (mean depth of EBV gene/mean depth for all other targeted genes). The last base at the end of each read was trimmed using a custom tool (*trim*) and the trimmed SAM file converted into a BAM file and indexed. A custom script (available on request) was used to generate summary statistics for coverage for all targets at different coverage depths and for different genes. Custom scripts (available on request) were developed for variant calling using *varscan*, and annotation of the variants using ensembls Variant Effect Predictor (VEP). IgCaller (Version 1.2 software utilizing the hg19 reference genome) was used to comprehensive analyze the rearrangements of the immunoglobulin genes and identify oncogenic translocations and Genomic Rearrangement Identification Software Suite with additional Picards options and Samtools as aligner (GRIDSS, version 2.13.2) was also included as structural variation caller. To visualize and distinguish true variants from false variants, Integrated Genome Viewer (IGV, version 2.13.0) was used. EBV DNA size ratio was calculated as the proportion of EBV DNA fragments with size between 180 - 200 base pairs (Total EBV DNA with size 180 - 200bp/Total autosomal DNA with size between 180 - 200 bp). Calculation of the size ratio and selection of the fragment size window was determined based on the methodology of a previous study looking at EBV DNA in nasopharyngeal carcinoma (W.K.J. Lam, et al, Proc. Natl. Acad. Sci. U.S.A, 2018) . The lower the EBV size ratio, the lower the proportion of EBV DNA molecules of size 180 – 200bp. The distribution of the fragment sizes for reads that map to regions of EBV and for reads that map to the autosomes was calculated and recorded as the EBV entropy and autosome entropy respectively. This gives a measure of how wide or clustered the distribution is of fragment sizes. The EBV DNA size ratio, EBV entropy and autosome entropy were calculated using custom scripts (Figure 1).


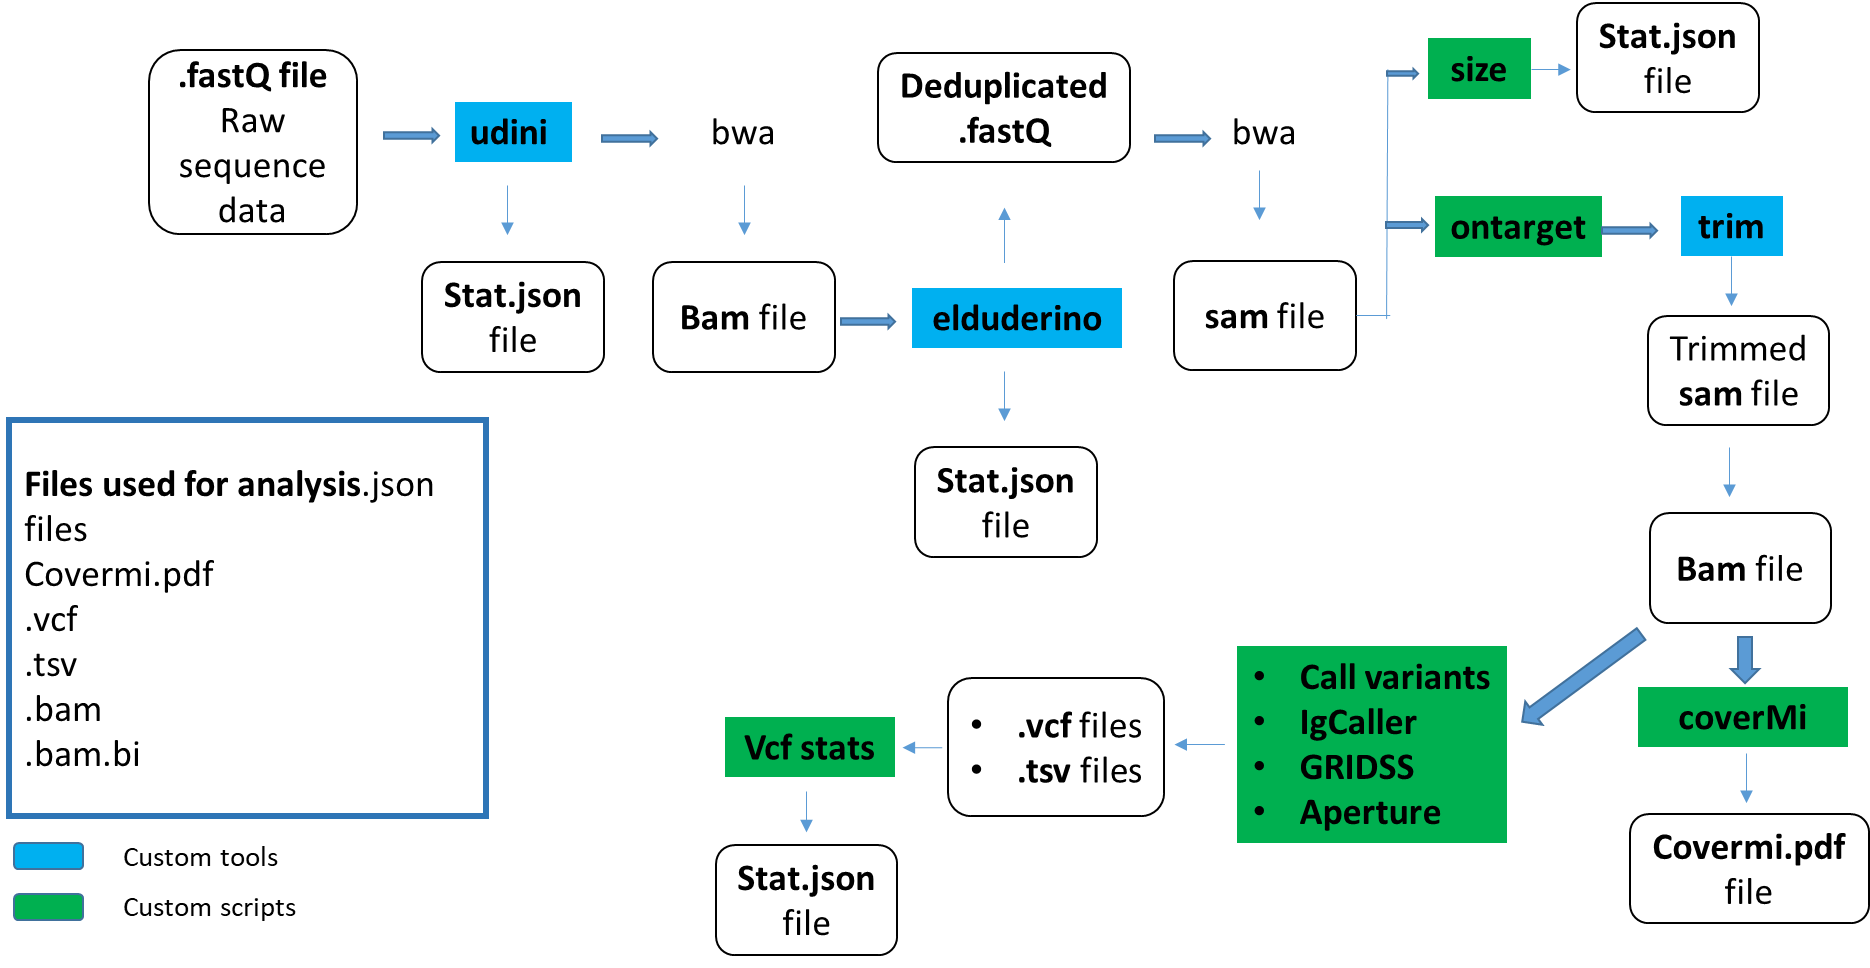


**Figure 1: Bio-informatics pipeline**

| **Sequencing Metric (units)** | **Median (Range)** |
| --- | --- |
| **Coverage depth** | **1966 (97 – 5836)** |
| **Alignment (%)** | **2.82 (0.33 – 7.48)** |
| **Yield (gb)** | **5.7 (1.4 – 8.05)** |
| **Cluster (%)** | **88.56 (58.5 – 96.04)** |
| **Error rate (%)** | **0.56 (0.3 – 2.79)** |
| **Q30 (%)** | **93.59 (64.18 – 98.01)** |
| **Percentage panel covered at least 100x** | **98 (0 – 99)** |
| **Ti/tv ratio** | **1.44 (0 – 2.07)** |
| **Percentage of Reads Off-target** | **61.46 (37.91 – 99.98)** |

**Table 2: Summary of Sequencing Metrics, n=308**


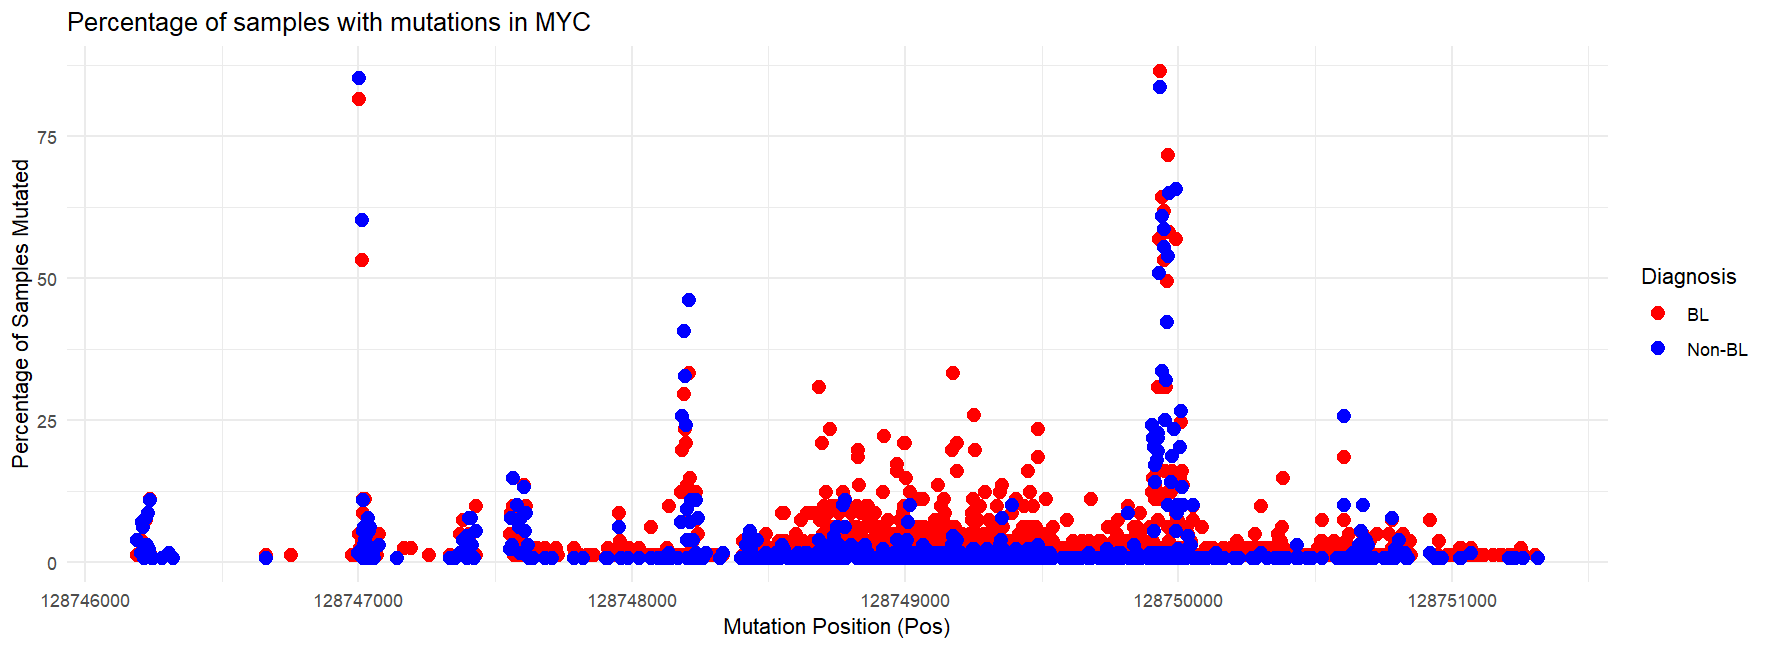


**Figure 2: Distribution of MYC mutations in BL and non-Bl samples expressed as a percentage of samples**


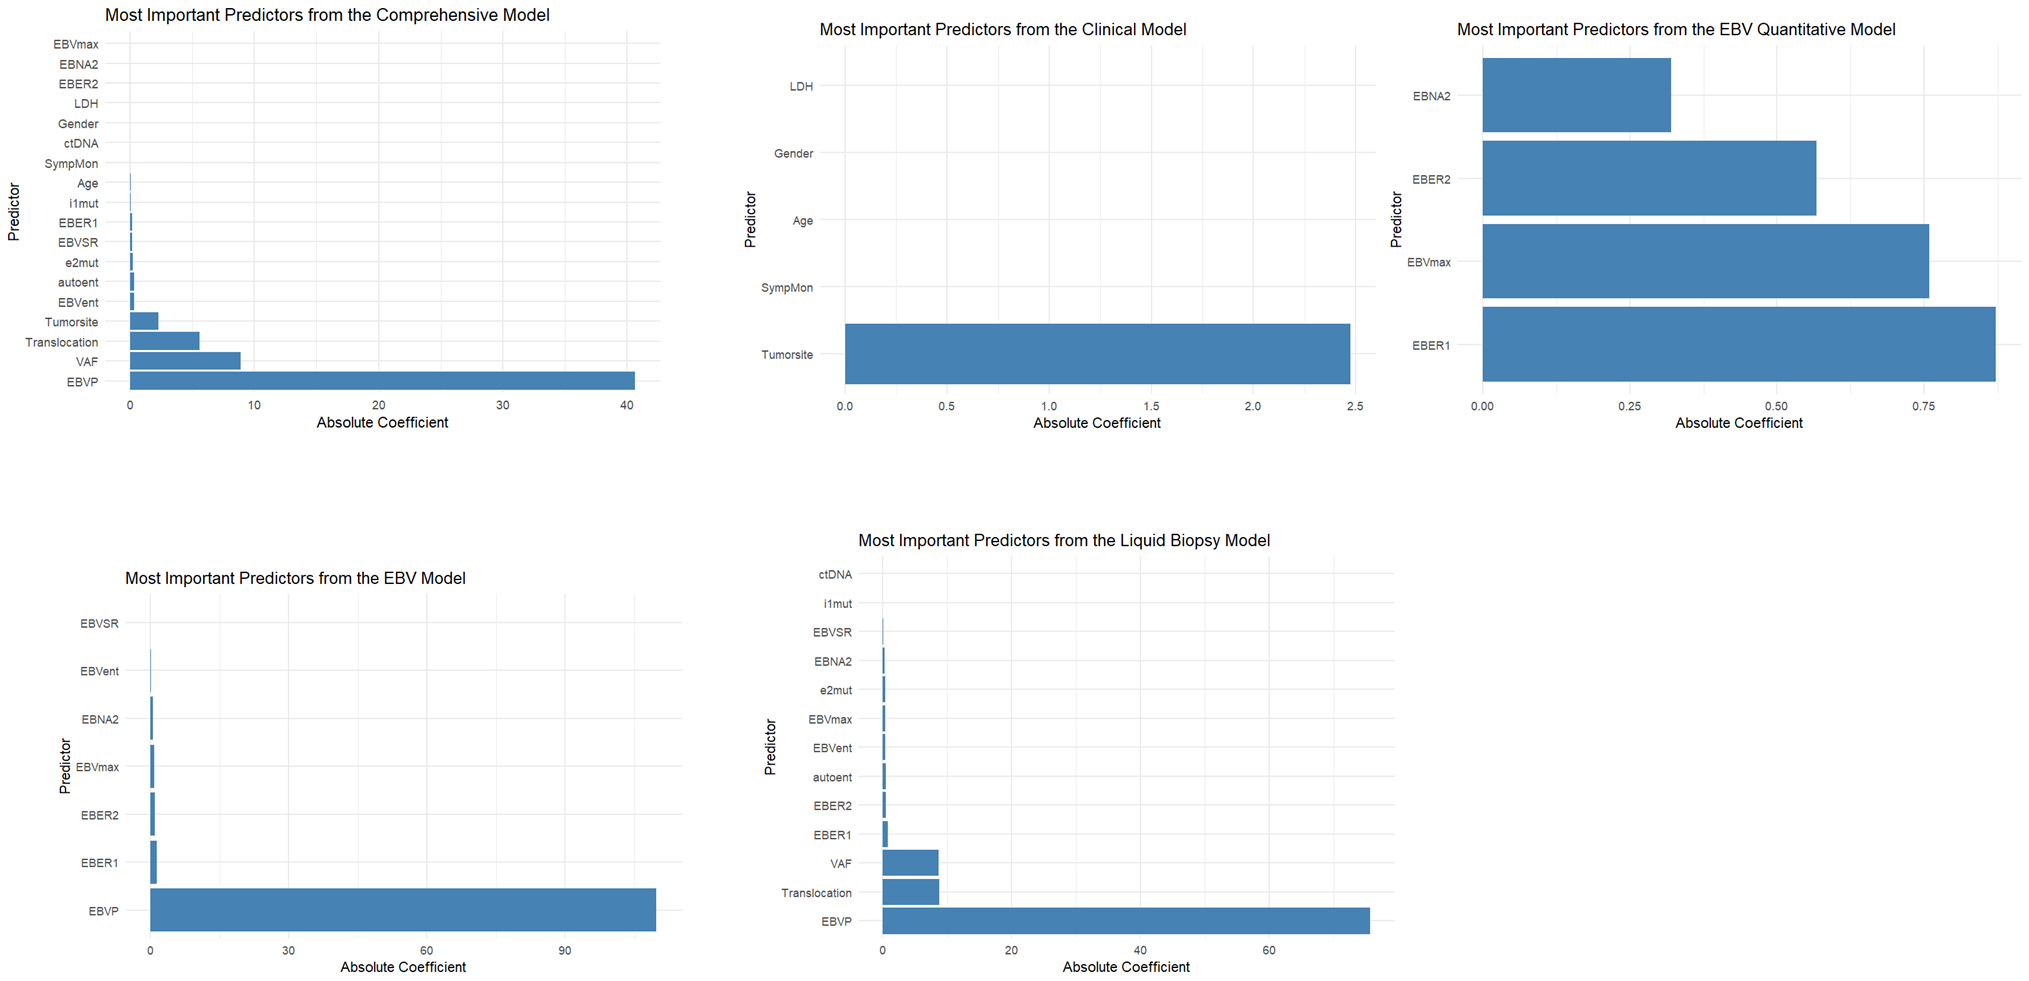


**Figure 3: Most Important Predictors from the Five Diagnostic Models**
